# Supplementary material for: Riemannian Geometry of Functional Connectivity Matrices for Multi-Site Attention-Deficit/Hyperactivity Disorder Data Harmonization
Source: Frontiers journal article supplement (doi:10.3389/fninf.2022.769274), 2022-05-23
Supplement: Data_Sheet_1.zip [file Data_Sheet_1.zip]

## Appendix

### EQUIVALENCE BETWEEN PARALLEL TRANSPORT AND MATRIX WHITENING

In general, matrix whitening and parallel transport using  $\bar{\Sigma}$  as the reference point are different transformations. However, we show here that under the condition  $[\bar{\Sigma}, \bar{\Sigma}^{(k)}] = 0, \forall k$ , both frameworks are equivalent. To this aim, consider the following property regarding the unique positive-definite square root of the product of two  $n \times n$  SPD matrices:

**Property:** Let  $A$  and  $B$  be two  $n \times n$  SPD matrices that commute, i.e.,  $[A, B] \equiv AB - BA = 0$ . Then  $(AB)^{\frac{1}{2}} = A^{\frac{1}{2}}B^{\frac{1}{2}}$ .

**Proof:** Considering that the unique SPD square root of some SPD matrix  $X$  can be computed as  $X^{\frac{1}{2}} = \text{Exp}(\frac{1}{2}\text{Log}(X))$ , and taking into account that, given two SPD matrices  $A$  and  $B$  such that  $[A, B] = 0$ ,  $\text{Exp}(A + B) = \text{Exp}(A)\text{Exp}(B)$  and  $\text{Log}(AB) = \text{Log}(A) + \text{Log}(B)$ :

$$\begin{aligned} (AB)^{\frac{1}{2}} &= \text{Exp}\left(\frac{1}{2}\text{Log}(AB)\right) = \text{Exp}\left(\frac{1}{2}(\text{Log}(A) + \text{Log}(B))\right) = \\ &= \text{Exp}\left(\frac{1}{2}\text{Log}(A)\right) \text{Exp}\left(\frac{1}{2}\text{Log}(B)\right) = A^{\frac{1}{2}}B^{\frac{1}{2}} \quad \square \end{aligned} \quad (\text{S1})$$

Now, recall that the overall parallel transport transformation (including the last matrix whitening step) when using as the reference point  $\Sigma_0$  the global mean is (subsection 2.4.2):

$$\Sigma_i^{(k)} \rightarrow \bar{\Sigma}^{-1/2} \left( \bar{\Sigma} (\bar{\Sigma}^{(k)})^{-1} \right)^{1/2} \Sigma_i^{(k)} \left( \left( \bar{\Sigma} (\bar{\Sigma}^{(k)})^{-1} \right)^{1/2} \right)^T \bar{\Sigma}^{-1/2}. \quad (\text{S2})$$

Supposing that  $\bar{\Sigma}$  and  $(\bar{\Sigma}^{(k)})^{-1}$  commute, by virtue of the previously stated property and taking into account that given two matrices  $A$  and  $B$ ,  $(AB)^T = B^T A^T$ :

$$\begin{aligned} \Sigma_i^{(k)} &\rightarrow \bar{\Sigma}^{-1/2} \left( \bar{\Sigma} (\bar{\Sigma}^{(k)})^{-1} \right)^{1/2} \Sigma_i^{(k)} \left( \left( \bar{\Sigma} (\bar{\Sigma}^{(k)})^{-1} \right)^{1/2} \right)^T \bar{\Sigma}^{-1/2} = \\ &= \bar{\Sigma}^{-1/2} \bar{\Sigma}^{1/2} \left( (\bar{\Sigma}^{(k)})^{-1} \right)^{1/2} \Sigma_i^{(k)} \left( (\bar{\Sigma}^{(k)})^{-1} \right)^{1/2} \bar{\Sigma}^{1/2} \bar{\Sigma}^{-1/2} = \\ &= \bar{\Sigma}^{-1/2} \bar{\Sigma}^{1/2} (\bar{\Sigma}^{(k)})^{-1/2} \Sigma_i^{(k)} (\bar{\Sigma}^{(k)})^{-1/2} \bar{\Sigma}^{1/2} \bar{\Sigma}^{-1/2} = \\ &= (\bar{\Sigma}^{(k)})^{-1/2} \Sigma_i^{(k)} (\bar{\Sigma}^{(k)})^{-1/2}, \end{aligned} \quad (\text{S3})$$

where in the second step we have used the facts that for a SPD matrix  $A$ , we take  $A^{1/2}$  to be also SPD and thus satisfies  $(A^{1/2})^T = A^{1/2}$ , along with  $((A)^{-1})^{1/2} = (A)^{-1/2}$ , with  $(A)^{-1/2}$  also SPD, and then,  $((A)^{-1/2})^T = (A)^{-1/2}$ . One can conclude that under vanishing commutators  $[\bar{\Sigma}, (\bar{\Sigma}^{(k)})^{-1}]$ , the transformation reduces to matrix whitening. Since  $\bar{\Sigma}$  and  $(\bar{\Sigma}^{(k)})^{-1}$  belong to  $GL(n)$ , the requirement

$[\bar{\Sigma}, (\bar{\Sigma}^{(k)})^{-1}] = 0$  is equivalent to  $[\bar{\Sigma}, \bar{\Sigma}^{(k)}] = 0$ . Therefore, when site means  $\bar{\Sigma}^{(k)}$  commute with the global mean  $\bar{\Sigma}$ , parallel transport and matrix whitening represent equivalent frameworks.

## PROPERTIES OF RIGID LOG-EUCLIDEAN TRANSLATION

As mentioned in the description of Rigid Log-Euclidean Translation in subsection 2.4.3, the transformation preserves intra-site geodesic distances under the LERM framework and displaces the matrices in such a way that their transformed site mean  $\tilde{\bar{\Sigma}}^{(k)}$  is the global mean  $\bar{\Sigma}$ , for all sites  $k$ .

By using the definition of LERM geodesic distance (7) for matrices belonging to the same site  $k$  and modified according to RLET( $\bar{\Sigma}$ ) transformation (14) one finds

$$\begin{aligned}
 d(\tilde{\Sigma}_i^{(k)}, \tilde{\Sigma}_j^{(k)}) &= \\
 &= \|\text{Log}(\tilde{\Sigma}_i^{(k)}) - \text{Log}(\tilde{\Sigma}_j^{(k)})\|_F = \\
 &= \|\text{Log}(\bar{\Sigma}) + \text{Log}(\Sigma_i^{(k)}) - \text{Log}(\bar{\Sigma}^{(k)}) - \text{Log}(\bar{\Sigma}) - \text{Log}(\Sigma_j^{(k)}) + \text{Log}(\bar{\Sigma}^{(k)})\|_F = \\
 &= \|\text{Log}(\Sigma_i^{(k)}) - \text{Log}(\Sigma_j^{(k)})\|_F = d(\Sigma_i^{(k)}, \Sigma_j^{(k)}),
 \end{aligned} \tag{S4}$$

meaning that intra-site geodesic distances are preserved as expected.

It is also straightforward to prove that  $\tilde{\bar{\Sigma}}^{(k)} = \bar{\Sigma}$ ,  $\forall k$ . Considering the definition of site mean (12) for matrices transformed according to (14):

$$\begin{aligned}
 \text{Log}(\tilde{\bar{\Sigma}}^{(k)}) &= \frac{1}{N^{(k)}} \sum_{i \in (k)} \text{Log}(\tilde{\Sigma}_i^{(k)}) = \\
 &= \frac{1}{N^{(k)}} \left( \sum_{i \in (k)} (\text{Log}(\bar{\Sigma}) + \text{Log}(\Sigma_i^{(k)}) - \text{Log}(\bar{\Sigma}^{(k)})) \right) = \\
 &= \frac{1}{N^{(k)}} (N^{(k)} \text{Log}(\bar{\Sigma}) - N^{(k)} \text{Log}(\bar{\Sigma}^{(k)})) + \frac{1}{N^{(k)}} \sum_{i \in (k)} \text{Log}(\Sigma_i^{(k)}) = \\
 &= \text{Log}(\bar{\Sigma}) - \text{Log}(\bar{\Sigma}^{(k)}) + \text{Log}(\bar{\Sigma}^{(k)}) = \text{Log}(\bar{\Sigma}),
 \end{aligned} \tag{S5}$$

and therefore site means become the global mean  $\bar{\Sigma}$ . In the case where the term  $\text{Log}(\bar{\Sigma})$  is removed from the transformation rule (14), one gets  $\text{Log}(\tilde{\bar{\Sigma}}^{(k)}) = 0 = \text{Log}(I)$ , and site means become the identity matrix  $I$ .
